# Supplementary material
Source: HighWire-hosted journal article supplement (https://jnm.snmjournals.org/highwire/filestream/100070/field_highwire_adjunct_files/0/249144_Supplemental_Data.pdf)
Supplement: 249144_Supplemental_Data.pdf [file 249144_Supplemental_Data.pdf]

**Supplemental Table 1:** Binding potentials of  $^{18}\text{F}$ -SynVesT-1 and  $^{11}\text{C}$ -UCB-J with the one-tissue compartment model under baseline condition

| Regions                | Reference: Centrum<br>semiovale $V_T$ |                        | Reference: $V_{ND}$ from Lassen<br>occupancy plot |                        |
|------------------------|---------------------------------------|------------------------|---------------------------------------------------|------------------------|
|                        | $^{18}\text{F}$ -SynVesT-1            | $^{11}\text{C}$ -UCB-J | $^{18}\text{F}$ -SynVesT-1                        | $^{11}\text{C}$ -UCB-J |
|                        | ( $n = 4$ )                           | ( $n = 4$ )            | ( $n = 4$ )                                       | ( $n = 4$ )            |
| Putamen                | 4.26 (14%)                            | 3.65 (24%)             | 7.53 (30%)                                        | 5.68 (26%)             |
| Insula cortex          | 4.18 (19%)                            | 3.45 (27%)             | 7.40 (32%)                                        | 5.38 (26%)             |
| Temporal cortex        | 4.29 (19%)                            | 3.64 (27%)             | 7.58 (31%)                                        | 5.61 (23%)             |
| Parietal cortex        | 4.10 (22%)                            | 3.56 (28%)             | 7.29 (33%)                                        | 5.47 (21%)             |
| Amygdala               | 3.91 (14%)                            | 3.31 (18%)             | 6.89 (24%)                                        | 5.22 (26%)             |
| Occipital cortex       | 3.99 (25%)                            | 3.45 (33%)             | 7.11 (36%)                                        | 5.29 (25%)             |
| Ant. cingulate cortex  | 3.92 (16%)                            | 3.29 (30%)             | 7.01 (33%)                                        | 5.20 (33%)             |
| Frontal cortex         | 3.83 (17%)                            | 3.25 (23%)             | 6.82 (30%)                                        | 5.09 (23%)             |
| Caudate nucleus        | 3.48 (11%)                            | 2.98 (22%)             | 6.24 (28%)                                        | 4.73 (26%)             |
| Post. cingulate cortex | 3.43 (29%)                            | 2.80 (37%)             | 6.3 (46%)                                         | 4.44 (35%)             |
| Thalamus               | 2.76 (14%)                            | 2.29 (24%)             | 5.06 (28%)                                        | 3.72 (24%)             |
| Cerebellum             | 2.66 (20%)                            | 2.10 (29%)             | 4.91 (30%)                                        | 3.41 (21%)             |
| Hippocampus            | 2.74 (16%)                            | 2.17 (17%)             | 5.01 (25%)                                        | 3.58 (26%)             |
| Globus pallidus        | 2.34 (28%)                            | 1.85 (38%)             | 4.47 (42%)                                        | 3.07 (30%)             |

$^{18}\text{F}$ -SynVesT-1:  $BP_{ND}$  using  $V_{T,CS} = 0.64 \times (BP_{ND}$  using the Lassen  $V_{ND}) - 0.33$ ,  $R^2 = 1.00$

$^{11}\text{C}$ -UCB-J:  $BP_{ND}$  using  $V_{T,CS} = 0.70 \times (BP_{ND}$  using the Lassen  $V_{ND}) - 0.31$ ,  $R^2 = 1.00$
